# Supplementary material for: Development for Multisensor and Virtual Simulator–Based Automatic Broadcast Shooting System
Source: Hindawi journal article supplement (doi:10.1155/2022/2724804), 2022-07-16
Supplement: f1 [file 2724804.f1.docx]

**Supplementary materials can be downloaded from the link below.**

Link:

<https://gisto365-my.sharepoint.com/:u:/g/personal/leewonjun_gm_gist_ac_kr/ES5r0tjKy15BgRNzwUR4gTIBhHogAXjEdHSqLwwwHkhhoQ?e=vykh3D>

or

[Supplemental_file.zip](https://gisto365-my.sharepoint.com/:u:/g/personal/leewonjun_gm_gist_ac_kr/ES5r0tjKy15BgRNzwUR4gTIBhHogAXjEdHSqLwwwHkhhoQ?e=gSXJh4)
